# Supplementary material for: Metabolomic Analysis Points to Bioactive Lipid Species and Acireductone Dioxygenase 1 (ADI1) as Potential Therapeutic Targets in Poor Prognosis Endometrial Cancer
Source: MDPI journal article supplement (doi:10.3390/cancers14122842), 2022-06-08

**Figure-S3 A****ADI 1**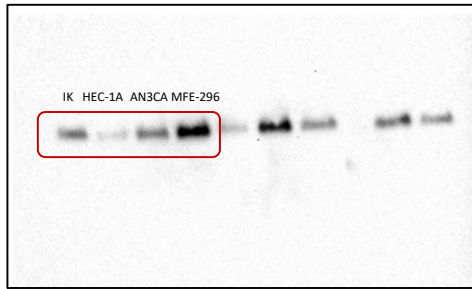**GAPDH**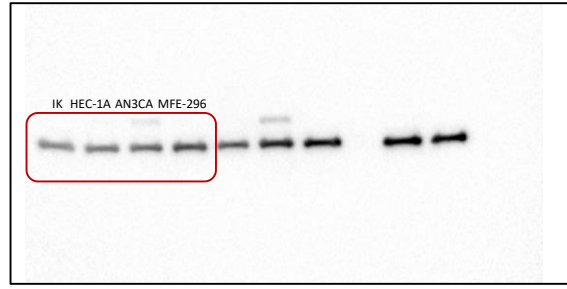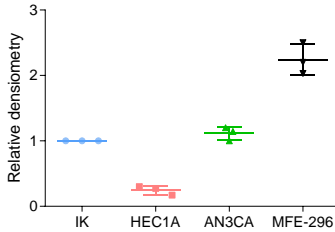

The quantification of the densitometric intensity of each western blot ADI1 band has been calculated from three western blot plots from three independent experiments. GAPDH was used as loading control.

**Figure-S3 B (Left)****ADI 1**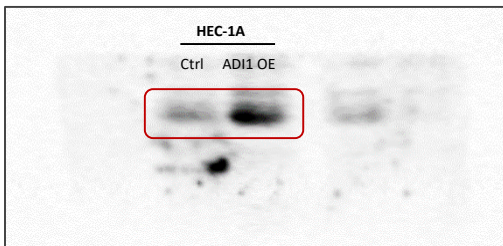**GAPDH**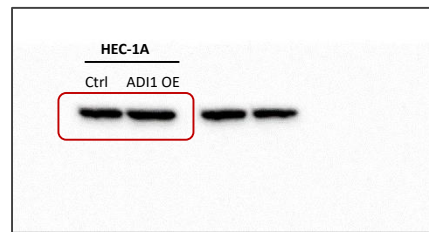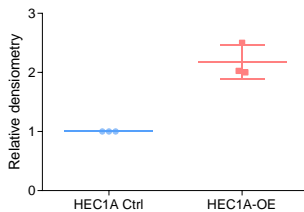

The quantification of the densitometric intensity of each western blot ADI1 band has been calculated from three western blot plots from three independent experiments. GAPDH was used as loading control.

**Figure-S3 B (Right)****ADI 1**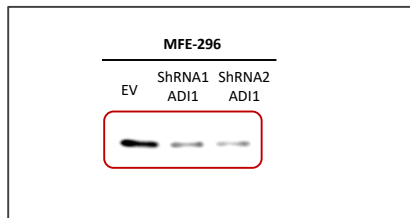**GAPDH**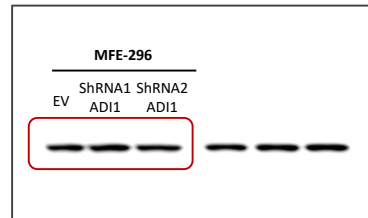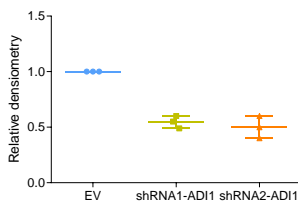

The quantification of the densitometric intensity of each western blot ADI1 band has been calculated from three western blot plots from three independent experiments. GAPDH was used as loading control.

**Figure-S3 A**

**ADI 1**

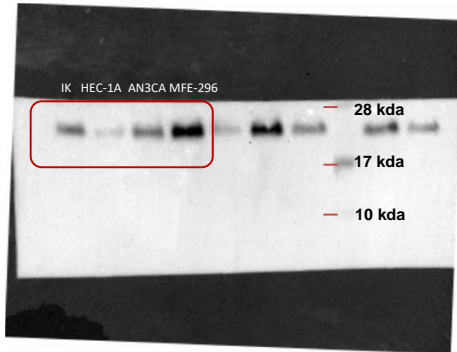

**GAPDH**

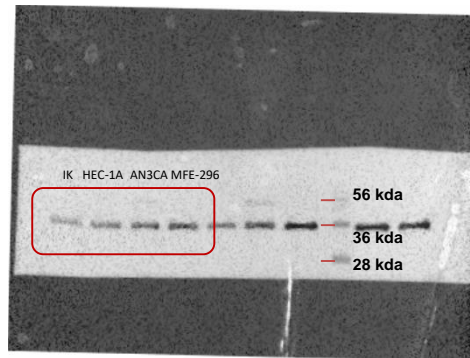

**Figure-S3 B (Left)**

**ADI 1**

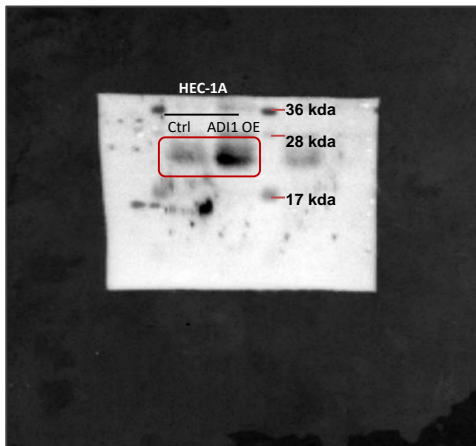

**GAPDH**

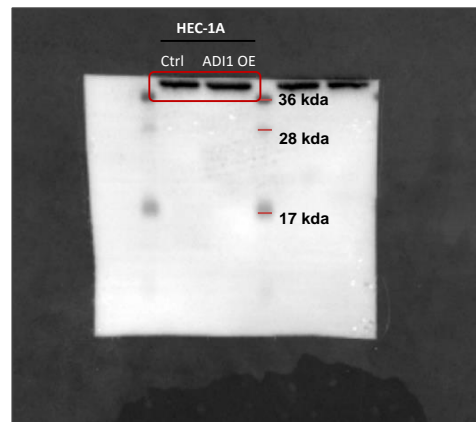

**Figure-S3 B (Right)**

**ADI 1**

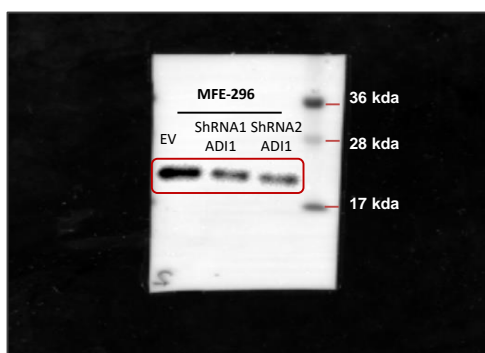

**GAPDH**

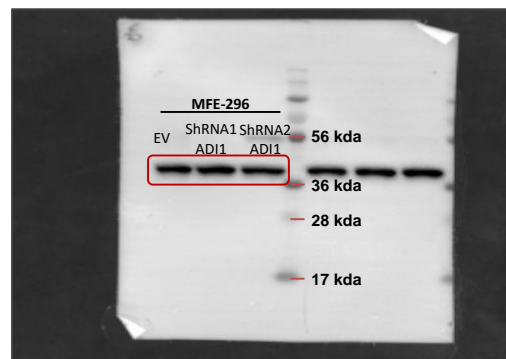

Figure-S4 B

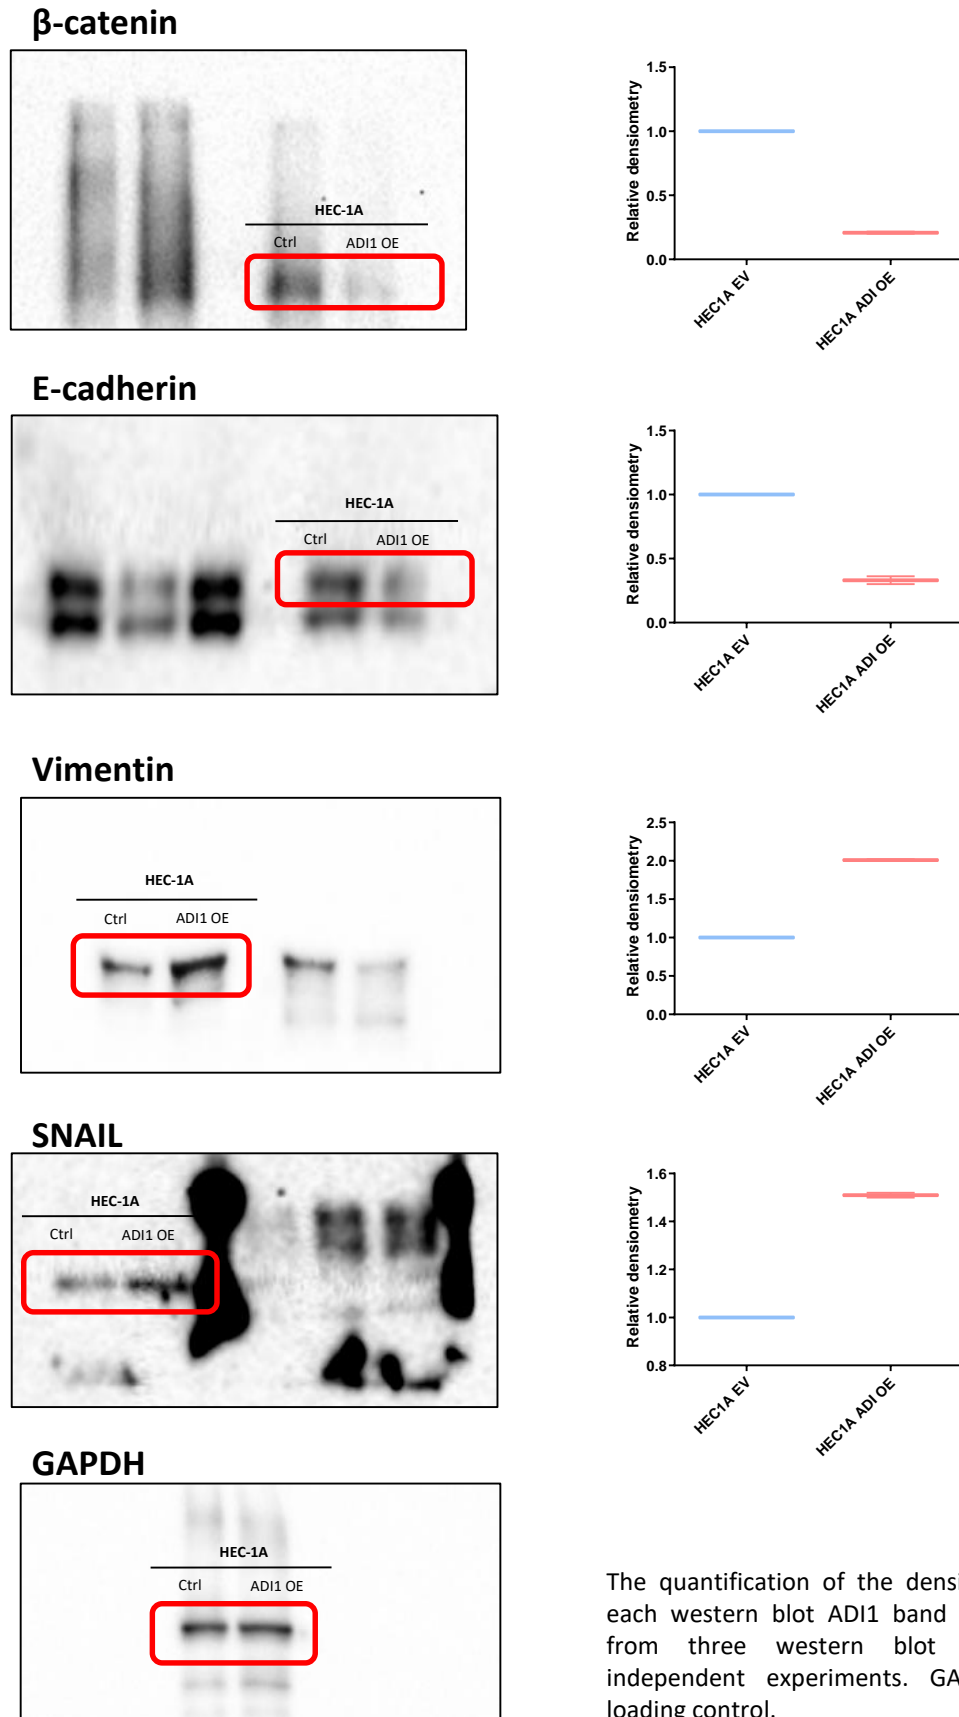

The quantification of the densitometric intensity of each western blot ADI1 band has been calculated from three western blot plots from three independent experiments. GAPDH was used as loading control.

Figure-S4 B

**$\beta$ -catenin**

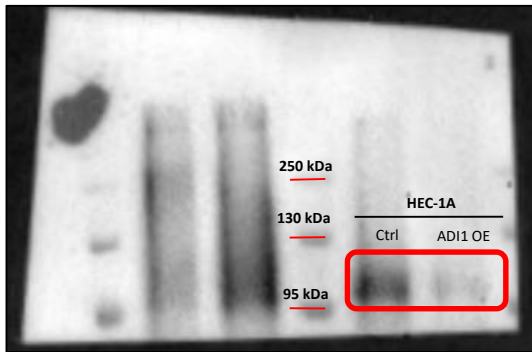

**E-cadherin**

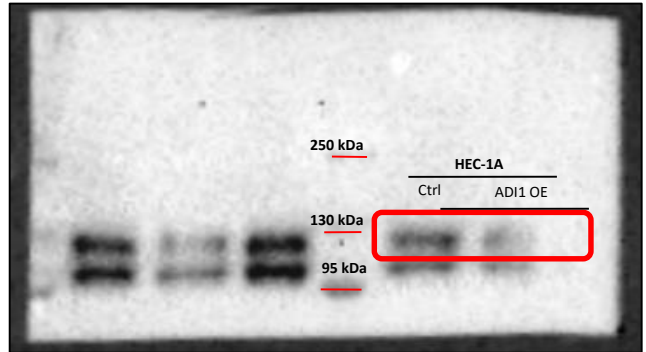

**Vimentin**

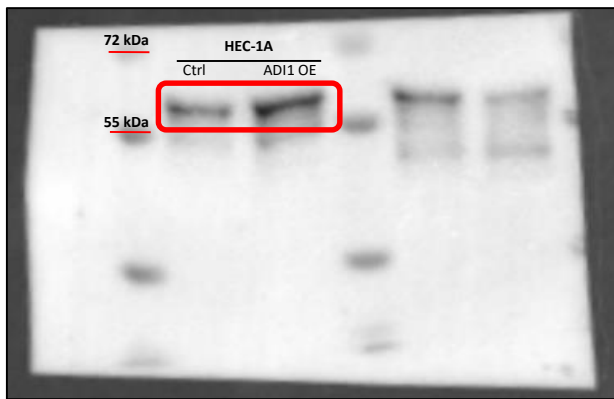

**SNAIL**

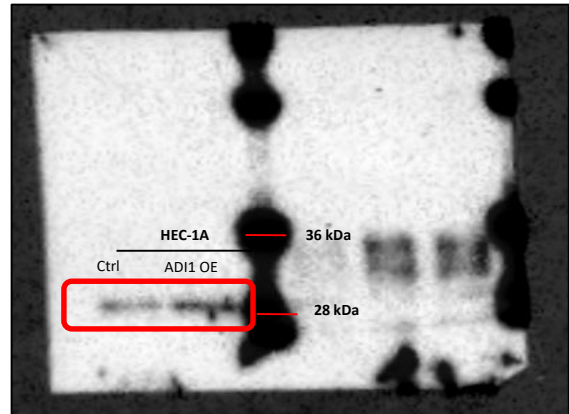

**GAPDH**

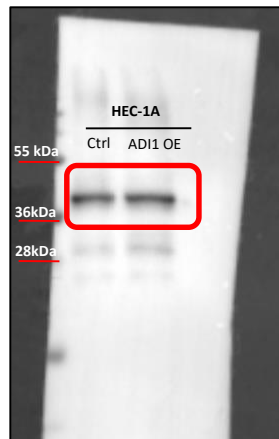

Figure-S4 D

 **$\beta$ -catenin**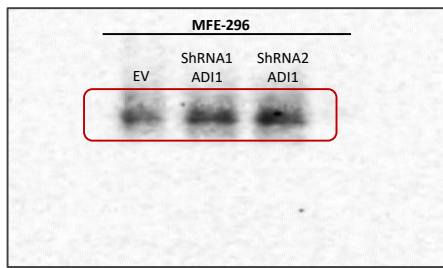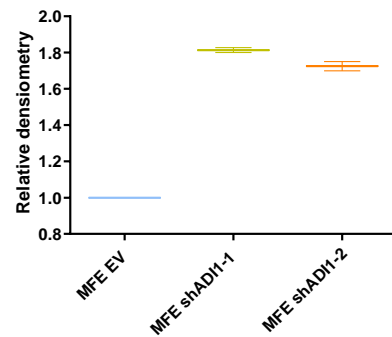**E-cadherin**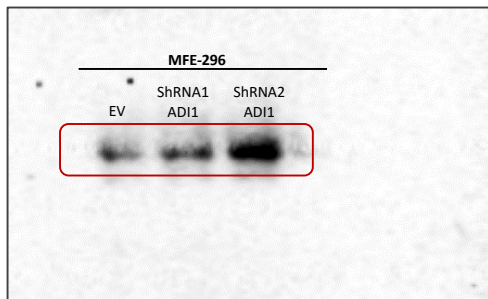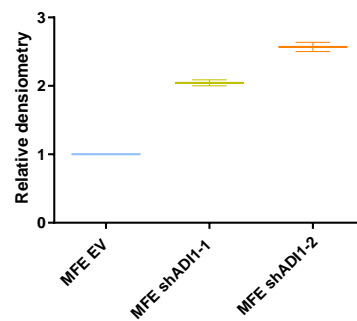**Vimentin**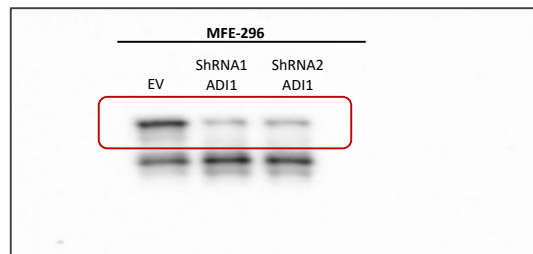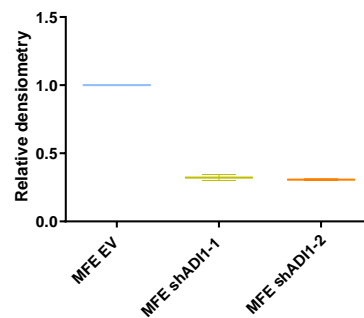**SNAIL**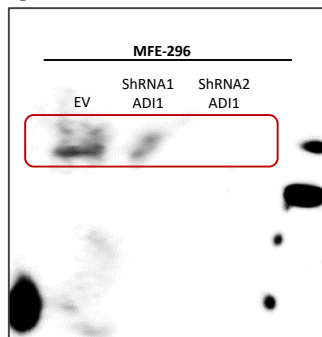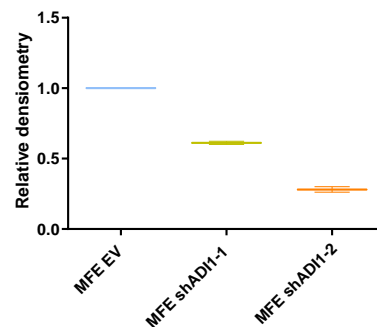**GAPDH**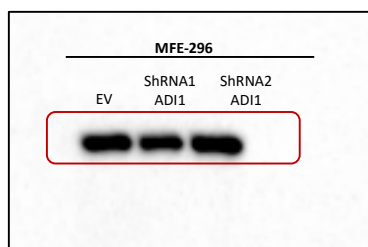

The quantification of the densitometric intensity of each western blot ADI1 band has been calculated from three western blot plots from three independent experiments. GAPDH was used as loading control.

Figure-S4 D

**$\beta$ -catenin**

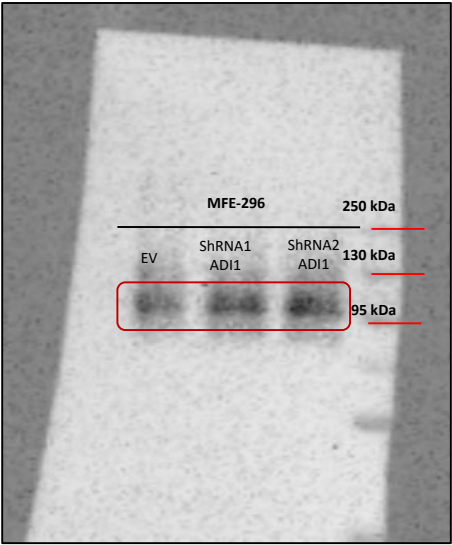

**E-cadherin**

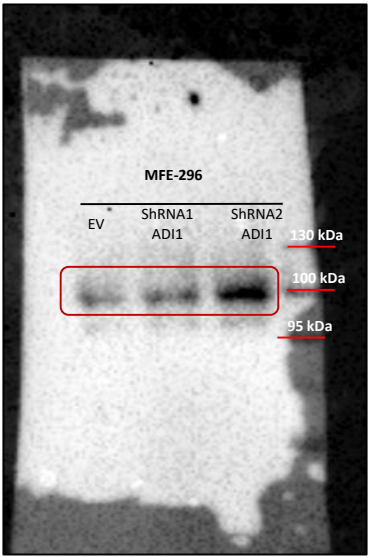

**Vimentin**

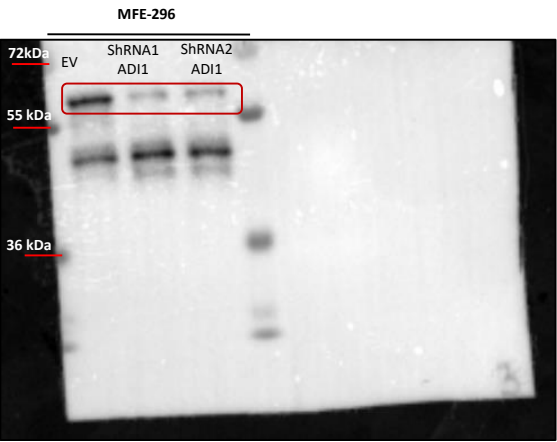

**SNAIL**

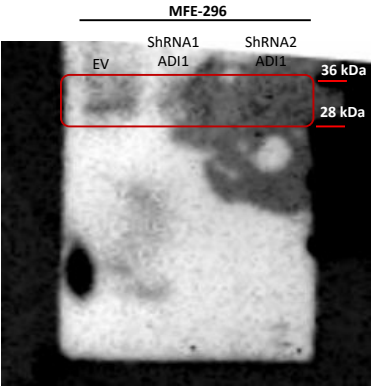

**GAPDH**

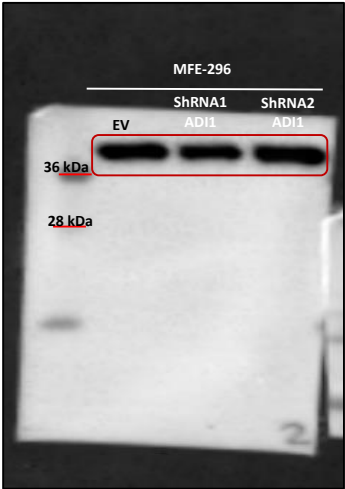

Supplement: s1 [file s1]
