# Supplementary material for: Metabolomic Analysis Points to Bioactive Lipid Species and Acireductone Dioxygenase 1 (ADI1) as Potential Therapeutic Targets in Poor Prognosis Endometrial Cancer
Source: MDPI journal article supplement (doi:10.3390/cancers14122842), 2022-06-08
Supplement: s1 [file s1]

| Compound                                                     | HMDB ID     | Class                               | Subclass                            | mass      | m/z       | RT   | p.value    | FDR       | Regulation (SC vs EEC) |
|--------------------------------------------------------------|-------------|-------------------------------------|-------------------------------------|-----------|-----------|------|------------|-----------|------------------------|
| Phthalic acid                                                | HMDB0002107 | Benzene and substituted derivatives | Benzoic acids and derivatives       | 148.0255  | 149.0255  | 9.5  | 0.0096685  | 0.09476   | down                   |
| Diheptyl phthalate                                           | HMDB0251285 | Benzene and substituted derivatives | Benzoic acids and derivatives       | 362.2476  | 363.2476  | 11.5 | 0.0041352  | 0.059558  | down                   |
| Phthalic acid Mono-2-ethylhexyl Ester                        | HMDB0013248 | Benzene and substituted derivatives | Benzoic acids and derivatives       | 278.1545  | 279.1545  | 9.5  | 0.003451   | 0.058653  | up                     |
| Glutathione                                                  | HMDB0000125 | Carboxylic acids and derivatives    | Amino acids, peptides, and analo    | 307.0837  | 308.0837  | 0.4  | 0.040854   | 0.19345   | up                     |
| Leucyl-phenylalanine                                         | HMDB0013243 | Carboxylic acids and derivatives    | Amino acids, peptides, and analo    | 278.1661  | 279.1661  | 9.5  | 0.0065027  | 0.078944  | down                   |
| L-Isoleucine                                                 | HMDB0000172 | Carboxylic acids and derivatives    | Amino acids, peptides, and analo    | 248.1468  | 249.1468  | 0.4  | 0.045153   | 0.20275   | up                     |
| N-Jasmonoyl isoleucine                                       | HMDB0029391 | Carboxylic acids and derivatives    | Amino acids, peptides, and analo    | 323.2122  | 324.2122  | 9.5  | 0.045153   | 0.20275   | up                     |
| Valine                                                       | HMDB0000883 | Carboxylic acids and derivatives    | Amino acids, peptides, and analo    | 117.0784  | 118.0784  | 0.4  | 0.033932   | 0.17334   | up                     |
| 8-iso-15-keto-PGE2                                           | HMDB0002341 | Fatty Acyls                         | Eicosanoids                         | 372.2053  | 373.2053  | 7.4  | 0.010132   | 0.09476   | down                   |
| Linoleyl carnitine                                           | HMDB0006469 | Fatty Acyls                         | Fatty acid esters                   | 423.3364  | 424.3364  | 9.8  | 0.020487   | 0.13665   | up                     |
| Tetracosatetraenoic acid                                     | HMDB0006246 | Fatty Acyls                         | Fatty acids and conjugates          | 342.2939  | 343.2939  | 7.4  | 0.0009416  | 0.030514  | down                   |
| 2-oxo-4-methylthiobutanoic acid                              | HMDB0001553 | Fatty Acyls                         | Fatty acids and conjugates          | 148.0165  | 149.0165  | 11.9 | 0.02082    | 0.13665   | up                     |
| Eicosatrienoic acid                                          | HMDB0010378 | Fatty Acyls                         | Fatty acids and conjugates          | 306.2528  | 307.2528  | 11.9 | 0.0087278  | 0.090507  | up                     |
| alpha-Linolenic acid                                         | HMDB0001388 | Fatty Acyls                         | Lineolic acids and derivatives      | 278.2193  | 279.2193  | 11.4 | 0.026493   | 0.15008   | down                   |
| FAHFA(16:0/13-O-16:0)                                        | HMDB0112127 | Fatty Acyls                         | Fatty acids and conjugates          | 548.4234  | 549.4234  | 12.9 | 0.010143   | 0.09476   | down                   |
| DG(34:4)                                                     | HMDB0007530 | Glycerolipids                       | Diradylglycerols                    | 588.4824  | 589.4824  | 13.2 | 0.00064951 | 0.021727  | down                   |
| DG(36:5)                                                     | HMDB0055974 | Glycerolipids                       | Diradylglycerols                    | 614.4996  | 615.4996  | 13.2 | 0.017212   | 0.12309   | down                   |
| DG(36:6)                                                     | HMDB0007734 | Glycerolipids                       | Diradylglycerols                    | 612.4706  | 613.4706  | 13.1 | 0.013272   | 0.11253   | down                   |
| DG(37:6)                                                     | HMDB0007764 | Glycerolipids                       | Diradylglycerols                    | 626.4929  | 627.4929  | 13.2 | 0.025968   | 0.15008   | down                   |
| DG(40:4)                                                     | HMDB0056054 | Glycerolipids                       | Diradylglycerols                    | 672.5836  | 673.5836  | 15.4 | 0.024363   | 0.1494    | down                   |
| DG(40:8)                                                     | HMDB0056354 | Glycerolipids                       | Diradylglycerols                    | 664.5056  | 665.5056  | 13.2 | 0.015826   | 0.12123   | down                   |
| DG(44:11)                                                    | HMDB0007759 | Glycerolipids                       | Diradylglycerols                    | 736.4961  | 737.4961  | 10.9 | 0.033685   | 0.17334   | down                   |
| DG(i-28:0)                                                   | HMDB0093347 | Glycerolipids                       | Diradylglycerols                    | 534.4314  | 535.4314  | 12.9 | 0.0056723  | 0.070026  | down                   |
| DG(i-33:0)                                                   | HMDB0094135 | Glycerolipids                       | Diradylglycerols                    | 582.5331  | 583.5331  | 14.1 | 0.022169   | 0.13943   | down                   |
| MG(18:1)                                                     | HMDB0011536 | Glycerolipids                       | Monoradylglycerols                  | 356.293   | 357.293   | 11.3 | 0.013272   | 0.11253   | down                   |
| MG(18:3)                                                     | HMDB0011570 | Glycerolipids                       | Monoradylglycerols                  | 374.2435  | 375.2435  | 10.4 | 0.0056723  | 0.070026  | down                   |
| MG(20:5)                                                     | HMDB0011580 | Glycerolipids                       | Monoradylglycerols                  | 398.2496  | 399.2496  | 11.7 | 0.006547   | 0.078944  | down                   |
| MG(22:0)                                                     | HMDB0011581 | Glycerolipids                       | Monoradylglycerols                  | 452.3387  | 453.3387  | 5.9  | 0.011262   | 0.1022    | down                   |
| MG(22:6)                                                     | HMDB0011587 | Glycerolipids                       | Monoradylglycerols                  | 384.2849  | 385.2849  | 10.4 | 0.0021001  | 0.042052  | down                   |
| MG(i-17:0)                                                   | HMDB0072852 | Glycerolipids                       | Monoradylglycerols                  | 366.2718  | 367.2718  | 11.4 | 0.026493   | 0.15008   | down                   |
| CDP-DG(38:4)                                                 | HMDB0115989 | Glycerophospholipids                | CDP-glycerols                       | 1067.5164 | 1068.5164 | 13.3 | 0.045361   | 0.20275   | up                     |
| LysoPA(18:1)                                                 | HMDB0007851 | Glycerophospholipids                | Glycerophosphates                   | 418.2675  | 419.2675  | 10.5 | 0.000217   | 0.0037419 | down                   |
| LysoPA(20:2)                                                 | HMDB0114758 | Glycerophospholipids                | Glycerophosphates                   | 462.2957  | 463.2957  | 10.6 | 0.00027798 | 0.012533  | down                   |
| LysoPA(20:3)                                                 | HMDB0114747 | Glycerophospholipids                | Glycerophosphates                   | 498.2271  | 499.2271  | 6.9  | 0.013508   | 0.11253   | down                   |
| LysoPA(22:1)                                                 | HMDB0114750 | Glycerophospholipids                | Glycerophosphates                   | 474.32    | 475.32    | 8.2  | 0.0041352  | 0.059558  | down                   |
| LysoPA(P-16:0)                                               | HMDB0011154 | Glycerophospholipids                | Glycerophosphates                   | 376.2554  | 377.2554  | 10.9 | 0.044511   | 0.20275   | down                   |
| PA(28:1)                                                     | HMDB0114795 | Glycerophospholipids                | Glycerophosphates                   | 572.4021  | 573.4021  | 12.6 | 0.025604   | 0.15008   | down                   |
| PA(29:1)                                                     | HMDB0114813 | Glycerophospholipids                | Glycerophosphates                   | 604.4157  | 605.4157  | 10.7 | 0.0021604  | 0.042052  | down                   |
| PA(30:2)                                                     | HMDB0114853 | Glycerophospholipids                | Glycerophosphates                   | 616.4202  | 617.4202  | 10.8 | 0.00015155 | 0.0098224 | down                   |
| PA(36:6)                                                     | HMDB0114792 | Glycerophospholipids                | Glycerophosphates                   | 692.4684  | 693.4684  | 10.8 | 0.0056723  | 0.070026  | down                   |
| PA(36:7)                                                     | HMDB0115011 | Glycerophospholipids                | Glycerophosphates                   | 690.4537  | 691.4537  | 10.5 | 0.0037003  | 0.059558  | down                   |
| PA(38:5)                                                     | HMDB0115151 | Glycerophospholipids                | Glycerophosphates                   | 704.4727  | 705.4727  | 10.9 | 0.0076209  | 0.084073  | down                   |
| PA(40:7)                                                     | HMDB0114943 | Glycerophospholipids                | Glycerophosphates                   | 746.4967  | 747.4967  | 12.5 | 0.021704   | 0.13943   | up                     |
| PA(44:9)                                                     | HMDB0115344 | Glycerophospholipids                | Glycerophosphates                   | 780.5217  | 781.5217  | 10.9 | 0.019748   | 0.13665   | down                   |
| PA(46:7)                                                     | HMDB0115479 | Glycerophospholipids                | Glycerophosphates                   | 830.5771  | 831.5771  | 12.2 | 0.0076209  | 0.084073  | down                   |
| PA(48:0)                                                     | HMDB0115453 | Glycerophospholipids                | Glycerophosphates                   | 854.7351  | 855.7351  | 14.9 | 0.0000866  | 0.0081641 | down                   |
| PA(48:1)                                                     | HMDB0115480 | Glycerophospholipids                | Glycerophosphates                   | 852.7199  | 853.7199  | 14.6 | 0.0014506  | 0.035815  | down                   |
| PA(48:2)                                                     | HMDB0115481 | Glycerophospholipids                | Glycerophosphates                   | 890.6926  | 891.6926  | 14.3 | 0.0098617  | 0.09476   | down                   |
| PA(i-27:0)                                                   | HMDB0115801 | Glycerophospholipids                | Glycerophosphates                   | 560.3887  | 561.3887  | 10.7 | 0.00097426 | 0.030615  | down                   |
| PA(P-34:2)                                                   | HMDB0011155 | Glycerophospholipids                | Glycerophosphates                   | 656.503   | 657.503   | 13   | 0.02976    | 0.16074   | down                   |
| LysoPC(20:1)                                                 | HMDB0010391 | Glycerophospholipids                | Glycerophosphocholines              | 531.3782  | 532.3782  | 10.3 | 0.00064951 | 0.021727  | down                   |
| LysoPC(22:2)                                                 | HMDB0010400 | Glycerophospholipids                | Glycerophosphocholines              | 575.4025  | 576.4025  | 10.4 | 0.0021001  | 0.042052  | down                   |
| LysoPC(28:1)                                                 | HMDB0029221 | Glycerophospholipids                | Glycerophosphocholines              | 643.487   | 644.487   | 10.8 | 0.045361   | 0.20275   | down                   |
| LysoPC(P-18:1)                                               | HMDB0010408 | Glycerophospholipids                | Glycerophosphocholines              | 487.3517  | 488.3517  | 10.2 | 0.022018   | 0.13943   | down                   |
| PC(34:5)                                                     | HMDB0007885 | Glycerophospholipids                | Glycerophosphocholines              | 751.5083  | 752.5083  | 10.6 | 0.0041352  | 0.059558  | down                   |
| PC(38:6)                                                     | HMDB0008212 | Glycerophospholipids                | Glycerophosphocholines              | 805.5721  | 806.5721  | 13.5 | 0.035678   | 0.17618   | down                   |
| LysoPE(24:1)                                                 | HMDB0011528 | Glycerophospholipids                | Glycerophosphoethanolamines         | 545.392   | 546.392   | 10.7 | 0.010132   | 0.09476   | down                   |
| LysoPE(O-16:3)                                               |             | Glycerophospholipids                | Glycerophosphoethanolamines         | 433.252   | 434.252   | 10.7 | 0.017016   | 0.12309   | down                   |
| PE(36:1)                                                     | HMDB0009057 | Glycerophospholipids                | Glycerophosphoethanolamines         | 745.5744  | 746.5744  | 13.5 | 0.0044838  | 0.062834  | down                   |
| PE(38:1)                                                     | HMDB0008999 | Glycerophospholipids                | Glycerophosphoethanolamines         | 773.6007  | 774.6007  | 13.7 | 0.0035067  | 0.058653  | down                   |
| PE(42:9)                                                     | HMDB0009694 | Glycerophospholipids                | Glycerophosphoethanolamines         | 795.534   | 796.534   | 10.6 | 0.01991    | 0.13665   | down                   |
| PE(O-35:6)                                                   | HMDB0008873 | Glycerophospholipids                | Glycerophosphoethanolamines         | 707.481   | 708.481   | 10.5 | 0.0021001  | 0.042052  | down                   |
| LysoPG(18:1)                                                 | HMDB0240602 | Glycerophospholipids                | Glycerophosphoglycerols             | 492.3069  | 493.3069  | 10.2 | 0.0000217  | 0.0037419 | down                   |
| PG(38:7)                                                     | HMDB0116631 | Glycerophospholipids                | Glycerophosphoglycerols             | 792.5243  | 793.5243  | 11   | 0.022018   | 0.13943   | down                   |
| PG(40:5)                                                     | HMDB0010612 | Glycerophospholipids                | Glycerophosphoglycerols             | 824.5453  | 825.5453  | 10.9 | 0.0029877  | 0.052513  | down                   |
| PG(40:8)                                                     | HMDB0010659 | Glycerophospholipids                | Glycerophosphoglycerols             | 800.4891  | 801.4891  | 10.6 | 0.0000217  | 0.0037419 | down                   |
| PG(42:9)                                                     | HMDB0116744 | Glycerophospholipids                | Glycerophosphoglycerols             | 844.5149  | 845.5149  | 10.7 | 0.0012528  | 0.03453   | down                   |
| PG(i-28:0)                                                   | HMDB0116664 | Glycerophospholipids                | Glycerophosphoglycerols             | 648.4432  | 649.4432  | 10.8 | 0.0005173  | 0.021458  | down                   |
| PG(i-30:2)                                                   | HMDB0116654 | Glycerophospholipids                | Glycerophosphoglycerols             | 712.4383  | 713.4383  | 10.5 | 0.0000217  | 0.0037419 | down                   |
| PGP(40:4)                                                    | HMDB0013513 | Glycerophospholipids                | Glycerophosphoglycerols             | 888.5384  | 889.5384  | 10.7 | 0.0028316  | 0.052435  | down                   |
| PGP(i-30:0)                                                  | HMDB0116542 | Glycerophospholipids                | Glycerophosphoglycerols             | 756.4626  | 757.4626  | 10.6 | 0.0000433  | 0.0064146 | down                   |
| PGP(i-37:0)                                                  | HMDB0116565 | Glycerophospholipids                | Glycerophosphoglycerols             | 872.5459  | 873.5459  | 11.2 | 0.033685   | 0.17334   | down                   |
| PIP2(36:1)                                                   | HMDB0010063 | Glycerophospholipids                | Glycerophosphoinositol phosphat     | 1006.5233 | 1007.5233 | 10.6 | 0.02082    | 0.13665   | up                     |
| LysoPI(18:2)                                                 | HMDB0240597 | Glycerophospholipids                | Glycerophosphoinositols             | 578.2943  | 579.2943  | 9.5  | 0.003452   | 0.058653  | down                   |
| PS(38:3)                                                     | HMDB0112598 | Glycerophospholipids                | Glycerophosphoserines               | 813.5753  | 814.5753  | 9.5  | 0.0028304  | 0.052435  | down                   |
| PS(40:1)                                                     | HMDB0112400 | Glycerophospholipids                | Glycerophosphoserines               | 883.5858  | 884.5858  | 10.7 | 0.049943   | 0.22133   | down                   |
| Kynurenine                                                   | HMDB0000684 | Organooxygen compounds              | Carbonyl compounds                  | 208.0856  | 209.0856  | 0.8  | 0.027929   | 0.15324   | up                     |
| 3-hydroxypristanic acid                                      | HMDB0061651 | Prenol lipids                       | Diterpenoids                        | 296.2762  | 297.2762  | 12.1 | 0.00015155 | 0.0098224 | down                   |
| Pristanic acid                                               | HMDB0000795 | Prenol lipids                       | Diterpenoids                        | 298.2912  | 299.2912  | 12.4 | 0.0041352  | 0.059558  | down                   |
| 2'-Deoxyguanosine 5'-monophosphate / adenosine monophosphate | HMDB0001044 | Purine nucleotides                  | Purine deoxyribonucleotides/Puriti  | 347.0631  | 348.0631  | 0.6  | 0.0021898  | 0.042052  | up                     |
| SM(d40:1)                                                    | HMDB0012092 | Sphingolipids                       | Phosphosphingolipids                | 786.6773  | 787.6773  | 14.4 | 0.0056723  | 0.070026  | down                   |
| SM(d40:2)                                                    | HMDB0240633 | Sphingolipids                       | Phosphosphingolipids                | 784.6655  | 785.6655  | 14.2 | 0.0076209  | 0.084073  | down                   |
| SM(d41:1)                                                    | HMDB0011695 | Sphingolipids                       | Phosphosphingolipids                | 800.6941  | 801.6941  | 14.5 | 0.0041352  | 0.059558  | down                   |
| SM(d41:2)                                                    | HMDB0240614 | Sphingolipids                       | Phosphosphingolipids                | 798.6723  | 799.6723  | 14.3 | 0.0002598  | 0.012246  | down                   |
| SM(d42:0)                                                    | HMDB0012094 | Sphingolipids                       | Phosphosphingolipids                | 838.7151  | 839.7151  | 14.5 | 0.0002598  | 0.012246  | down                   |
| SM(d42:1)                                                    | HMDB0011697 | Sphingolipids                       | Phosphosphingolipids                | 796.6668  | 797.6668  | 14.1 | 0.034987   | 0.17359   | down                   |
| SM(d42:2)                                                    | HMDB0240635 | Sphingolipids                       | Phosphosphingolipids                | 812.6951  | 813.6951  | 14.4 | 0.0056723  | 0.070026  | down                   |
| SM(d43:1)                                                    | HMDB0240673 | Sphingolipids                       | Phosphosphingolipids                | 828.7289  | 829.7289  | 14.8 | 0.017212   | 0.12309   | down                   |
| SM(d43:2)                                                    | HMDB0011699 | Sphingolipids                       | Phosphosphingolipids                | 826.7039  | 827.7039  | 14.6 | 0.0000217  | 0.0037419 | down                   |
| SM(d44:2)                                                    | HMDB0013461 | Sphingolipids                       | Phosphosphingolipids                | 840.7301  | 841.7301  | 14.7 | 0.0002598  | 0.012246  | down                   |
| Chenodeoxycholic acid 3-sulfate                              | HMDB0002586 | Steroids and steroid derivatives    | Bile acids, alcohols and derivative | 472.2704  | 473.2704  | 11.7 | 0.0076209  | 0.084073  | down                   |
| 12-Ketodeoxycholic acid                                      | HMDB0000328 | Steroids and steroid derivatives    | Bile acids, alcohols and derivative | 390.2796  | 391.2796  | 11.9 | 0.026276   | 0.15008   | up                     |
| 7-Ketodeoxycholic acid                                       | HMDB0000391 | Steroids and steroid derivatives    | Bile acids, alcohols and derivative | 4289.2434 | 429.2434  | 11.9 | 0.02082    | 0.13665   | up                     |
| 1021.5268_11.5                                               |             |                                     |                                     | 1020.5268 | 1021.5268 | 11.5 | 0.037003   | 0.18015   | down                   |
| 1061.6003_8.7                                                |             |                                     |                                     | 1060.6003 | 1061.6003 | 8.7  | 0.02976    | 0.16074   | down                   |

|                |           |           |      |            |                |
|----------------|-----------|-----------|------|------------|----------------|
| 1074.4623_12.9 | 1073.4623 | 1074.4623 | 12.9 | 0.020487   | 0.13665 up     |
| 109.0937_3.7   | 108.0937  | 109.0937  | 3.7  | 0.015965   | 0.12123 down   |
| 111.1038_3.3   | 110.1038  | 111.1038  | 3.3  | 0.0056723  | 0.070026 down  |
| 1119.6414_9.1  | 1118.6414 | 1119.6414 | 9.1  | 0.0000866  | 0.0081641 down |
| 149.0175_9.5   | 148.0175  | 149.0175  | 9.5  | 0.0087278  | 0.090507 up    |
| 161.0715_3.1   | 160.0715  | 161.0715  | 3.1  | 0.020487   | 0.13665 up     |
| 167.0823_0.8   | 166.0823  | 167.0823  | 0.8  | 0.043474   | 0.20036 down   |
| 198.9881_1.5   | 197.9881  | 198.9881  | 1.5  | 0.020467   | 0.13665 down   |
| 201.1752_10    | 200.1752  | 201.1752  | 10   | 0.03336    | 0.17334 down   |
| 205.0781_9.5   | 204.0781  | 205.0781  | 9.5  | 0.0087278  | 0.090507 up    |
| 205.0898_9.5   | 204.0898  | 205.0898  | 9.5  | 0.015615   | 0.12123 down   |
| 219.1665_9.9   | 218.1665  | 219.1665  | 9.9  | 0.0098617  | 0.09476 down   |
| 230.2406_8.1   | 229.2406  | 230.2406  | 8.1  | 0.0042499  | 0.060372 down  |
| 246.1644_1.8   | 245.1644  | 246.1644  | 1.8  | 0.03336    | 0.17334 down   |
| 254.1293_5.9   | 253.1293  | 254.1293  | 5.9  | 0.027929   | 0.15324 down   |
| 258.2726_9.1   | 257.2726  | 258.2726  | 9.1  | 0.011333   | 0.1022 down    |
| 265.2412_11.3  | 264.2412  | 265.2412  | 11.3 | 0.0012343  | 0.03453 down   |
| 271.261_12     | 270.261   | 271.261   | 12   | 0.02976    | 0.16074 down   |
| 304.2932_8.6   | 303.2932  | 304.2932  | 8.6  | 0.024492   | 0.1494 down    |
| 312.3223_12.2  | 311.3223  | 312.3223  | 12.2 | 0.0003804  | 0.016437 down  |
| 318.2941_9     | 317.2941  | 318.2941  | 9    | 0.025968   | 0.15008 down   |
| 327.1758_8.1   | 326.1758  | 327.1758  | 8.1  | 0.034448   | 0.17341 down   |
| 341.1097_2.7   | 340.1097  | 341.1097  | 2.7  | 0.0041128  | 0.059558 down  |
| 341.2549_10.3  | 340.2549  | 341.2549  | 10.3 | 0.00064951 | 0.021727 down  |
| 350.2538_11.1  | 349.2538  | 350.2538  | 11.1 | 0.007424   | 0.084073 up    |
| 350.754_11.1   | 349.754   | 350.754   | 11.1 | 0.034446   | 0.17341 up     |
| 367.1421_0.7   | 366.1421  | 367.1421  | 0.7  | 0.0087278  | 0.090507 up    |
| 367.2076_7.4   | 366.2076  | 367.2076  | 7.4  | 0.012724   | 0.11182 down   |
| 369.232_6.9    | 368.232   | 369.232   | 6.9  | 0.012607   | 0.11173 down   |
| 373.2266_5     | 372.2266  | 373.2266  | 5    | 0.013272   | 0.11253 down   |
| 378.7853_11.7  | 377.7853  | 378.7853  | 11.7 | 0.0021816  | 0.042052 up    |
| 387.2404_6     | 386.2404  | 387.2404  | 6    | 0.0056723  | 0.070026 down  |
| 394.2944_11.9  | 393.2944  | 394.2944  | 11.9 | 0.020487   | 0.13665 up     |
| 394.7193_7.4   | 393.7193  | 394.7193  | 7.4  | 0.010132   | 0.09476 down   |
| 395.2189_7.4   | 394.2189  | 395.2189  | 7.4  | 0.017016   | 0.12309 down   |
| 397.2698_11.7  | 396.2698  | 397.2698  | 11.7 | 0.025961   | 0.15008 up     |
| 401.09_9.5     | 400.09    | 401.09    | 9.5  | 0.022185   | 0.13943 down   |
| 401.2632_6.9   | 400.2632  | 401.2632  | 6.9  | 0.0076209  | 0.084073 down  |
| 409.7571_10.6  | 408.7571  | 409.7571  | 10.6 | 0.0021816  | 0.042052 down  |
| 412.7766_13.6  | 411.7766  | 412.7766  | 13.6 | 0.0087278  | 0.090507 up    |
| 414.3134_10.5  | 413.3134  | 414.3134  | 10.5 | 0.042169   | 0.19877 down   |
| 415.2388_11.4  | 414.2388  | 415.2388  | 11.4 | 0.013885   | 0.11253 down   |
| 416.7644_11    | 415.7644  | 416.7644  | 11   | 0.0002598  | 0.012246 down  |
| 424.353_10.5   | 423.353   | 424.353   | 10.5 | 0.034987   | 0.17359 down   |
| 425.1787_10.5  | 424.1787  | 425.1787  | 10.5 | 0.012607   | 0.11173 down   |
| 431.7713_10.7  | 430.7713  | 431.7713  | 10.7 | 0.040224   | 0.19134 down   |
| 433.3314_12.4  | 432.3314  | 433.3314  | 12.4 | 0.010132   | 0.09476 down   |
| 437.7031_7.4   | 436.7031  | 437.7031  | 7.4  | 0.037667   | 0.18084 down   |
| 438.7803_11    | 437.7803  | 438.7803  | 11   | 0.017212   | 0.12309 down   |
| 441.1492_6     | 440.1492  | 441.1492  | 6    | 0.022018   | 0.13943 down   |
| 449.2818_10.2  | 448.2818  | 449.2818  | 10.2 | 0.010132   | 0.09476 down   |
| 453.3369_8.2   | 452.3369  | 453.3369  | 8.2  | 0.0029539  | 0.052513 down  |
| 453.3389_2.7   | 452.3389  | 453.3389  | 2.7  | 0.046193   | 0.20559 down   |
| 453.8432_8.2   | 452.8432  | 453.8432  | 8.2  | 0.0021001  | 0.042052 down  |
| 464.835_8.2    | 463.835   | 464.835   | 8.2  | 0.03795    | 0.18136 down   |
| 465.8122_11    | 464.8122  | 465.8122  | 11   | 0.043474   | 0.20036 down   |
| 466.5275_11.7  | 465.5275  | 466.5275  | 11.7 | 0.031064   | 0.1652 down    |
| 468.7948_11    | 467.7948  | 468.7948  | 11   | 0.037003   | 0.18015 down   |
| 471.3477_4.2   | 470.3477  | 471.3477  | 4.2  | 0.0041352  | 0.059558 down  |
| 472.3156_8.2   | 471.3156  | 472.3156  | 8.2  | 0.0098617  | 0.09476 down   |
| 473.338_10.6   | 472.338   | 473.338   | 10.6 | 0.0000866  | 0.0081641 down |
| 475.7955_10.8  | 474.7955  | 475.7955  | 10.8 | 0.013508   | 0.11253 down   |
| 485.3624_4.9   | 484.3624  | 485.3624  | 4.9  | 0.0011978  | 0.03453 down   |
| 495.2666_11.9  | 494.2666  | 495.2666  | 11.9 | 0.020487   | 0.13665 up     |
| 512.4092_10.6  | 511.4092  | 512.4092  | 10.6 | 0.017212   | 0.12309 down   |
| 513.2733_8.3   | 512.2733  | 513.2733  | 8.3  | 0.020487   | 0.13665 up     |
| 515.2018_6.9   | 514.2018  | 515.2018  | 6.9  | 0.013885   | 0.11253 down   |
| 517.3645_10.6  | 516.3645  | 517.3645  | 10.6 | 0.00015155 | 0.0098224 down |
| 520.3271_5.3   | 519.3271  | 520.3271  | 5.3  | 0.037253   | 0.18052 down   |
| 522.5968_12.1  | 521.5968  | 522.5968  | 12.1 | 0.045361   | 0.20275 up     |
| 529.8302_11.1  | 528.8302  | 529.8302  | 11.1 | 0.025144   | 0.15008 down   |
| 534.333_11.1   | 533.333   | 534.333   | 11.1 | 0.037667   | 0.18084 down   |
| 537.3314_10.3  | 536.3314  | 537.3314  | 10.3 | 0.0002598  | 0.012246 down  |
| 549.4311_13    | 548.4311  | 549.4311  | 13   | 0.016015   | 0.12123 down   |
| 549.9556_11.7  | 548.9556  | 549.9556  | 11.7 | 0.033791   | 0.17334 up     |
| 550.6221_12.3  | 549.6221  | 550.6221  | 12.3 | 0.0000866  | 0.0081641 down |
| 556.4331_10.7  | 555.4331  | 556.4331  | 10.7 | 0.034987   | 0.17359 down   |
| 557.1855_6     | 556.1855  | 557.1855  | 6    | 0.02663    | 0.15008 up     |
| 557.5207_14    | 556.5207  | 557.5207  | 14   | 0.031064   | 0.1652 down    |
| 567.2764_5.9   | 566.2764  | 567.2764  | 5.9  | 0.033685   | 0.17334 down   |
| 570.8598_11.2  | 569.8598  | 570.8598  | 11.2 | 0.030195   | 0.16224 down   |
| 575.2704_5.9   | 574.2704  | 575.2704  | 5.9  | 0.022018   | 0.13943 down   |
| 581.3576_10.4  | 580.3576  | 581.3576  | 10.4 | 0.036505   | 0.17941 down   |
| 585.5519_14.3  | 584.5519  | 585.5519  | 14.3 | 0.026493   | 0.15008 down   |
| 595.8757_11.2  | 594.8757  | 595.8757  | 11.2 | 0.0087278  | 0.090507 up    |
| 597.8952_11.2  | 596.8952  | 597.8952  | 11.2 | 0.011012   | 0.10196 down   |
| 599.2244_10.6  | 598.2244  | 599.2244  | 10.6 | 0.025968   | 0.15008 down   |
| 600.4616_10.7  | 599.4616  | 600.4616  | 10.7 | 0.043474   | 0.20036 down   |
| 605.2764_5.9   | 604.2764  | 605.2764  | 5.9  | 0.043474   | 0.20036 down   |
| 610.5388_13.2  | 609.5388  | 610.5388  | 13.2 | 0.024492   | 0.1494 down    |
| 614.8841_11.2  | 613.8841  | 614.8841  | 11.2 | 0.011333   | 0.1022 down    |
| 620.4301_10.4  | 619.4301  | 620.4301  | 10.4 | 0.00015155 | 0.0098224 down |
| 623.2668_5.9   | 622.2668  | 623.2668  | 5.9  | 0.0011355  | 0.03453 down   |
| 627.4276_7.9   | 626.4276  | 627.4276  | 7.9  | 0.022569   | 0.14099 down   |
| 631.4526_12.5  | 630.4526  | 631.4526  | 12.5 | 0.02663    | 0.15008 up     |
| 639.4815_13.2  | 638.4815  | 639.4815  | 13.2 | 0.01389    | 0.11253 down   |
| 641.4591_9.4   | 640.4591  | 641.4591  | 9.4  | 0.03336    | 0.17334 down   |

|               |          |          |      |            |                |
|---------------|----------|----------|------|------------|----------------|
| 653.3796_10.8 | 652.3796 | 653.3796 | 10.8 | 0.0098617  | 0.09476 down   |
| 655.4849_12.9 | 654.4849 | 655.4849 | 12.9 | 0.00019448 | 0.011863 down  |
| 659.2847_11.5 | 658.2847 | 659.2847 | 11.5 | 0.0041001  | 0.059558 down  |
| 668.6204_12.2 | 667.6204 | 668.6204 | 12.2 | 0.00015155 | 0.0098224 down |
| 685.512_7.4   | 684.512  | 685.512  | 7.4  | 0.0021001  | 0.042052 down  |
| 69.0584_3.3   | 68.0584  | 69.0584  | 3.3  | 0.027929   | 0.15324 down   |
| 696.4294_6.4  | 695.4294 | 696.4294 | 6.4  | 0.024363   | 0.1494 down    |
| 696.6486_12.4 | 695.6486 | 696.6486 | 12.4 | 0.034448   | 0.17341 down   |
| 706.4664_7.4  | 705.4664 | 706.4664 | 7.4  | 0.00064951 | 0.021727 down  |
| 706.9627_7.4  | 705.9627 | 706.9627 | 7.4  | 0.0021604  | 0.042052 down  |
| 710.9616_7.4  | 709.9616 | 710.9616 | 7.4  | 0.01617    | 0.12151 down   |
| 711.4633_7.4  | 710.4633 | 711.4633 | 7.4  | 0.007424   | 0.084073 down  |
| 717.4817_6.8  | 716.4817 | 717.4817 | 6.8  | 0.045077   | 0.20275 down   |
| 735.4814_10.6 | 734.4814 | 735.4814 | 10.6 | 0.0012653  | 0.03453 down   |
| 741.4174_7.4  | 740.4174 | 741.4174 | 7.4  | 0.01389    | 0.11253 down   |
| 777.4526_7.4  | 776.4526 | 777.4526 | 7.4  | 0.0056723  | 0.070026 down  |
| 779.4048_7.4  | 778.4048 | 779.4048 | 7.4  | 0.024682   | 0.14968 down   |
| 793.444_7.4   | 792.444  | 793.444  | 7.4  | 0.015965   | 0.12123 down   |
| 805.0151_13.4 | 804.0151 | 805.0151 | 13.4 | 0.020487   | 0.13665 up     |
| 823.6836_14.2 | 822.6836 | 823.6836 | 14.2 | 0.027929   | 0.15324 down   |
| 825.6865_14.4 | 824.6865 | 825.6865 | 14.4 | 0.0076209  | 0.084073 down  |
| 831.4429_7.4  | 830.4429 | 831.4429 | 7.4  | 0.0021001  | 0.042052 down  |
| 833.0487_13.5 | 832.0487 | 833.0487 | 13.5 | 0.014177   | 0.11397 down   |
| 847.4222_7.4  | 846.4222 | 847.4222 | 7.4  | 0.015965   | 0.12123 down   |
| 852.4565_7.4  | 851.4565 | 852.4565 | 7.4  | 0.02681    | 0.15028 down   |
| 855.4121_7.4  | 854.4121 | 855.4121 | 7.4  | 0.015965   | 0.12123 down   |
| 865.7169_14.5 | 864.7169 | 865.7169 | 14.5 | 0.0014506  | 0.035815 down  |
| 867.7357_14.8 | 866.7357 | 867.7357 | 14.8 | 0.00064951 | 0.021727 down  |
| 869.7587_15.1 | 868.7587 | 869.7587 | 15.1 | 0.013272   | 0.11253 down   |
| 873.6244_12.3 | 872.6244 | 873.6244 | 12.3 | 0.017212   | 0.12309 down   |
| 877.7327_14.5 | 876.7327 | 877.7327 | 14.5 | 0.0041352  | 0.059558 down  |
| 879.7479_14.7 | 878.7479 | 879.7479 | 14.7 | 0.0029877  | 0.052513 down  |
| 881.763_14.9  | 880.763  | 881.763  | 14.9 | 0.0000217  | 0.0037419 down |
| 883.78_15.3   | 882.78   | 883.78   | 15.3 | 0.0014506  | 0.035815 down  |
| 887.4749_7.2  | 886.4749 | 887.4749 | 7.2  | 0.0056723  | 0.070026 down  |
| 895.7644_15.1 | 894.7644 | 895.7644 | 15.1 | 0.0014506  | 0.035815 down  |
| 907.7667_15   | 906.7667 | 907.7667 | 15   | 0.0056723  | 0.070026 down  |
| 909.7818_15.4 | 908.7818 | 909.7818 | 15.4 | 0.00064951 | 0.021727 down  |
| 917.57_11.2   | 916.57   | 917.57   | 11.2 | 0.015965   | 0.12123 down   |
| 923.6378_12.2 | 922.6378 | 923.6378 | 12.2 | 0.025961   | 0.15008 down   |
